# Supplementary material for: Nanorod structure tuning and defect engineering of MoOx for high-performance SERS substrates
Source: Royal Society of Chemistry journal article supplement (doi:10.1039/d4nr04368e), 2024-01-01
Supplement: d4nr04368e1.pdf [file d4nr04368e1.pdf]

## DATA

**Table S1.** Fabrication parameters of MoO<sub>x</sub> rod-like SERS substrate

| Sputtering parameter                                | Parameter value       | Unit |
|-----------------------------------------------------|-----------------------|------|
| Substrate temperature                               | 30                    | °C   |
| Target-to-substrate distance                        | 7                     | cm   |
| Base pressure                                       | 1.48x10 <sup>-6</sup> | Torr |
| Working gas pressure                                | 8.35x10 <sup>-3</sup> | Torr |
| Power                                               | 60                    | W    |
| Ratio between Ar: O <sub>2</sub><br>(99.99% purity) | 10:2                  | sccm |

**Table S2.** Lattice parameters and crystal sizes of samples S15, S20, S25, and S30

|                          | MoO <sub>3</sub><br>(standard<br>value) <sup>25</sup> | S15    | S20    | S25    | S30    |
|--------------------------|-------------------------------------------------------|--------|--------|--------|--------|
| <b>Lattice parameter</b> |                                                       |        |        |        |        |
| a (Å)                    | 3.962                                                 | 3.963  | 3.970  | 3.962  | 3.960  |
| b (Å)                    | 13.858                                                | 13.887 | 13.887 | 13.891 | 13.888 |
| c (Å)                    | 3.696                                                 | 3.698  | 3.698  | 3.696  | 3.698  |
| <b>Crystal size (nm)</b> |                                                       |        |        |        |        |
| (020)                    |                                                       | 71.3   | 77.6   | 86.0   | 96.7   |

**Table S3.** The vibration modes and intensities of characteristic peaks in the Raman spectra for S15, S20, S25, and S30 samples.

| Band frequency (cm <sup>-1</sup> ) | Representation <sup>28</sup>      | Attribution <sup>28</sup>                                                          |
|------------------------------------|-----------------------------------|------------------------------------------------------------------------------------|
| 115                                | B <sub>2g</sub>                   | Translational rigid MoO <sub>4</sub> chain mode along “c” direction T <sub>c</sub> |
| 127                                | B <sub>3g</sub>                   | Translational chain mode along “c” direction (T <sub>c</sub> )                     |
| 158                                | A <sub>g</sub> /B <sub>1g</sub>   | Translational chain mode along “b” direction (T <sub>b</sub> )                     |
| 198                                | B <sub>2g</sub>                   | τ O=M=O twist                                                                      |
| 216                                | A <sub>g</sub>                    | Rotational rigid MoO <sub>4</sub> chain mode R <sub>c</sub>                        |
| 245                                | B <sub>3g</sub>                   | τ O=M=O twist                                                                      |
| 283                                | B <sub>2g</sub>                   | δ O=M=O wagging                                                                    |
| 337                                | A <sub>g</sub> , B <sub>1g</sub>  | δ O-M-O bend                                                                       |
| 378                                | B <sub>1g</sub>                   | δ O-M-O scissor                                                                    |
| 473                                | A <sub>g</sub>                    | u <sub>as</sub> O–M–O stretch and bend                                             |
| 663                                | B <sub>2g</sub> , B <sub>3g</sub> | u <sub>as</sub> O–M–O stretch                                                      |
| 815                                | A <sub>g</sub>                    | u <sub>s</sub> M=O stretch MoO <sub>6</sub>                                        |
| 990                                | A <sub>g</sub> , B <sub>1g</sub>  | u <sub>as</sub> M=O asymmetric stretch                                             |

**Table S4.** Lattice parameters and crystal sizes of samples A30, A45, A60, A75, and A90.

|                              | MoO <sub>3</sub><br>(standard value) <sup>25</sup> | A30    | A45    | A60    | A75    | A90    |
|------------------------------|----------------------------------------------------|--------|--------|--------|--------|--------|
| <b>Lattice parameter (Å)</b> |                                                    |        |        |        |        |        |
| a (Å)                        | 3.962                                              | 3.970  | 3.974  | 3.965  | 3.963  | 3.963  |
| b (Å)                        | 13.858                                             | 13.885 | 13.886 | 13.881 | 13.881 | 13.886 |
| c (Å)                        | 3.696                                              | 3.695  | 3.698  | 3.700  | 3.697  | 3.697  |
| <b>Crystal size (nm)</b>     |                                                    |        |        |        |        |        |
| (020)                        |                                                    | 77.5   | 85.5   | 86.0   | 85.5   | 86.0   |
| (110)                        |                                                    | 43.4   | 54.1   | 61.9   | 61.9   | 61.9   |

**Table S5:** SERS intensity of R6G at 609 cm<sup>-1</sup> peak absorbing on six MoO<sub>x</sub> SERS substrates which fabricated under the same condition

| No.                     | 1          | 2    | 3              | 4         | 5    | 6              |
|-------------------------|------------|------|----------------|-----------|------|----------------|
| <b>Intensity (a.u.)</b> | 3400       | 3200 | 3128           | 2900      | 3125 | 3300           |
| <b>Summary</b>          |            |      |                |           |      |                |
| <b>Count</b>            | <b>Sum</b> |      | <b>Average</b> | <b>SD</b> |      | <b>RSD (%)</b> |
| 6                       | 19053      |      | 3175.5         | 171.58526 |      | 5.38           |

**Table S6:** SERS intensity of R6G at 609 cm<sup>-1</sup> peak at five random positions with 1 ppm adsorbed on the surface of MoO<sub>x</sub> SERS substrate produced after 3 months, 6 months, and 9 months.

| No.            | 3 months     |            | 6 months       |           | 9 months       |  |
|----------------|--------------|------------|----------------|-----------|----------------|--|
| 1              | 3000         |            | 3200           |           | 3100           |  |
| 2              | 3100         |            | 2950           |           | 3200           |  |
| 3              | 2800         |            | 3257           |           | 2500           |  |
| 4              | 3500         |            | 2400           |           | 2800           |  |
| 5              | 3200         |            | 2784           |           | 2700           |  |
| <b>Summary</b> |              |            |                |           |                |  |
| <b>Sample</b>  | <b>count</b> | <b>sum</b> | <b>average</b> | <b>SD</b> | <b>RSD (%)</b> |  |
| 3 months       | 5            | 15600      | 3120           | 258.84358 | 8.23           |  |
| 6 months       | 5            | 14591      | 2918           | 347.04063 | 11.89          |  |
| 9 months       | 5            | 14300      | 2860           | 482.70074 | 13.32          |  |
