# Supplementary material for: Nanorod structure tuning and defect engineering of MoOx for high-performance SERS substrates
Source: Royal Society of Chemistry journal article supplement (doi:10.1039/d4nr04368e), 2024-01-01
Supplement: d4nr04368e2.pdf [file d4nr04368e2.pdf]

## Supplementary Information

### Nanorod structure tuning and defect engineering of MoO<sub>x</sub> for high performance SERS substrates

Trong Vo Huu<sup>a,b</sup>, Hong Le Thi Thu<sup>a,b</sup>, Long Nguyen Hoang<sup>a,b</sup>, Khanh Huynh Thuy Doan<sup>a,b</sup>, Khanh Nguyen Duy<sup>a,b</sup>, Tuan Dao Anh<sup>a,b</sup>, Huyen Le Thi Minh<sup>a,b,c</sup>, Ke Nguyen Huu<sup>a,b</sup>, Hung Le Vu Tuan<sup>a,b</sup>

<sup>a</sup>Faculty of Physics and Engineering Physics, University of Science, Ho Chi Minh City 700000, Vietnam.

<sup>b</sup>Vietnam National University, Ho Chi Minh City 700000, Vietnam.

<sup>c</sup> Faculty of Fundamental Sciences, University of Medicine and Pharmacy at Ho Chi Minh City, Vietnam.

**Table S1** Fabrication parameters of MoO<sub>x</sub> rod-like SERS substrate

| Sputtering parameter                                | Parameter value       | Unit |
|-----------------------------------------------------|-----------------------|------|
| Substrate temperature                               | 30                    | °C   |
| Target-to-substrate distance                        | 7                     | cm   |
| Base pressure                                       | 1.48x10 <sup>-6</sup> | Torr |
| Working gas pressure                                | 8.35x10 <sup>-3</sup> | Torr |
| Power                                               | 60                    | W    |
| Ratio between Ar: O <sub>2</sub><br>(99.99% purity) | 10:2                  | sccm |

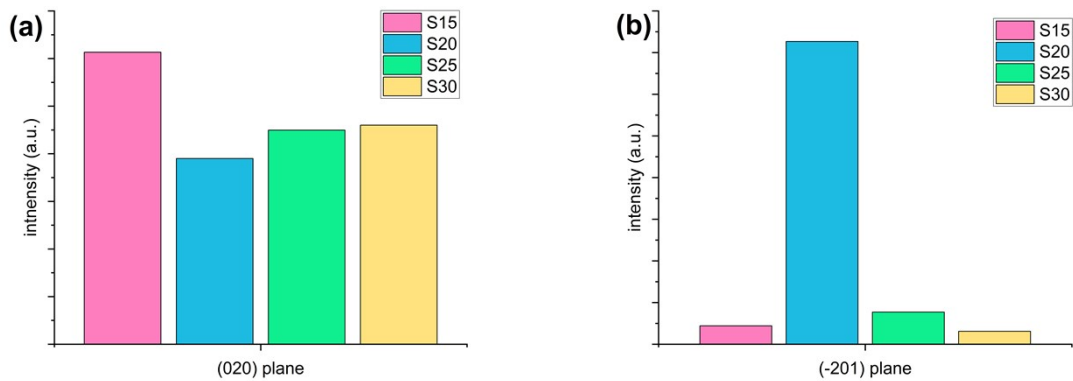**Fig S1.** Comparison intensity of X-ray diffraction pattern of MoO<sub>x</sub> thin films deposited at various sputtering time on glass substrate

a) at (020) plane for sample S15, S20, S25, and S30;

b) at (-201) plane for sample S15, S20, S25, and S30.

**Table S2:** Lattice parameters and crystal sizes of samples S15, S20, S25, and S30

|                          | MoO <sub>3</sub><br>(standard<br>value) <sup>28</sup> | S15    | S20    | S25    | S30    |
|--------------------------|-------------------------------------------------------|--------|--------|--------|--------|
| <b>Lattice parameter</b> |                                                       |        |        |        |        |
| a (Å)                    | 3.962                                                 | 3.963  | 3.970  | 3.962  | 3.960  |
| b (Å)                    | 13.858                                                | 13.887 | 13.887 | 13.891 | 13.888 |
| c (Å)                    | 3.696                                                 | 3.698  | 3.698  | 3.696  | 3.698  |
| <b>Crystal size (nm)</b> |                                                       |        |        |        |        |
| (020)                    |                                                       | 71.3   | 77.6   | 86.0   | 96.7   |

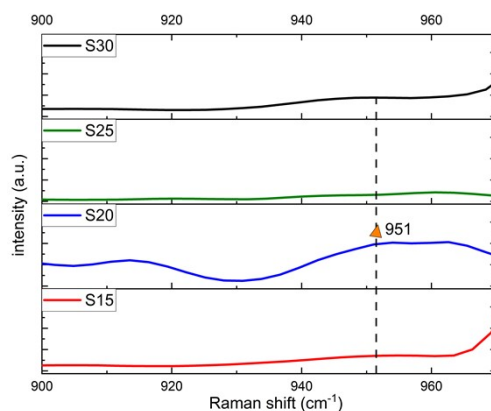

**Fig. S2.** Raman intensity at 951 cm<sup>-1</sup> peak for S15, S20, S25, and S30 samples.

**Table S3:** The vibration modes and intensities of characteristic peaks in the Raman spectra for S15, S20, S25, and S30 samples.

| Band frequency (cm <sup>-1</sup> ) | Representation <sup>31</sup>      | Attribution <sup>31</sup>                                                          |
|------------------------------------|-----------------------------------|------------------------------------------------------------------------------------|
| 115                                | B <sub>2g</sub>                   | Translational rigid MoO <sub>4</sub> chain mode along "c" direction T <sub>c</sub> |
| 127                                | B <sub>3g</sub>                   | Translational chain mode along "c" direction (T <sub>c</sub> )                     |
| 158                                | A <sub>g</sub> /B <sub>1g</sub>   | Translational chain mode along "b" direction (T <sub>b</sub> )                     |
| 198                                | B <sub>2g</sub>                   | τ O=M=O twist                                                                      |
| 216                                | A <sub>g</sub>                    | Rotational rigid MoO <sub>4</sub> chain mode R <sub>c</sub>                        |
| 245                                | B <sub>3g</sub>                   | τ O=M=O twist                                                                      |
| 283                                | B <sub>2g</sub>                   | δ O=M=O wagging                                                                    |
| 337                                | A <sub>g</sub> , B <sub>1g</sub>  | δ O-M-O bend                                                                       |
| 378                                | B <sub>1g</sub>                   | δ O-M-O scissor                                                                    |
| 473                                | A <sub>g</sub>                    | u <sub>as</sub> O-M-O stretch and bend                                             |
| 663                                | B <sub>2g</sub> , B <sub>3g</sub> | u <sub>as</sub> O-M-O stretch                                                      |
| 815                                | A <sub>g</sub>                    | u <sub>s</sub> M=O stretch MoO <sub>6</sub>                                        |
| 990                                | A <sub>g</sub> , B <sub>1g</sub>  | u <sub>as</sub> M=O asymmetric stretch                                             |

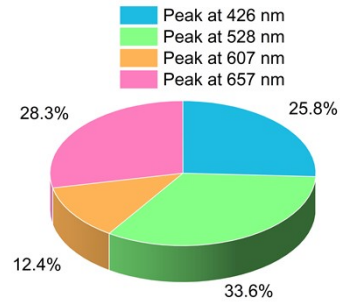

**Fig. S3.** The pie charts illustrate the contribution of component emissions to the total PL spectrum of S20.

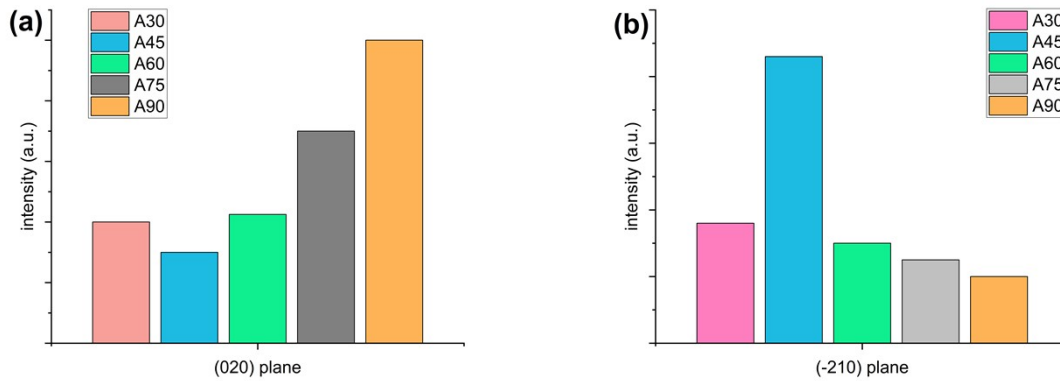

**Fig. S4.** Comparison intensity of X-ray diffraction pattern of MoO<sub>x</sub> thin films deposited at various annealing time on glass substrate. a) at (020) plane for sample A30, A45, A60, A75, and A90. b) at (-201) plane for sample A30, A45, A60, A75, and A90.

**Table S4:** Lattice parameters and crystal sizes of samples A30, A45, A60, A75, and A90.

|                              | MoO <sub>3</sub><br>(standard value) <sup>28</sup> | A30    | A45    | A60    | A75    | A90    |
|------------------------------|----------------------------------------------------|--------|--------|--------|--------|--------|
| <b>Lattice parameter (Å)</b> |                                                    |        |        |        |        |        |
| a (Å)                        | 3.962                                              | 3.970  | 3.974  | 3.965  | 3.963  | 3.963  |
| b (Å)                        | 13.858                                             |        |        |        |        |        |
| c (Å)                        | 3.696                                              | 13.885 | 13.886 | 13.881 | 13.881 | 13.886 |
| <b>Crystal size (nm)</b>     |                                                    |        |        |        |        |        |
| (020)                        |                                                    | 77.5   | 85.5   | 86.0   | 85.5   | 86.0   |
| (110)                        |                                                    | 43.4   | 54.1   | 61.9   | 61.9   | 61.9   |

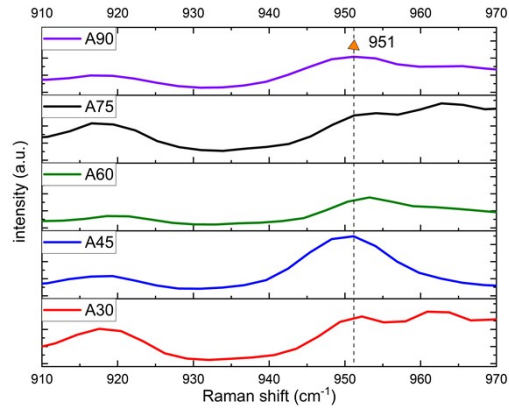

**Fig. S5.** Raman intensity at  $951\text{ cm}^{-1}$  wavenumber for A30, A45, A60, A75, and A90 samples

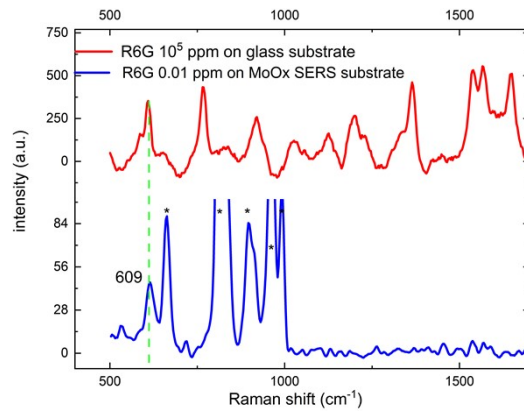

**Fig. S6.** Raman spectra of R6G at  $10^5$  ppm on glass substrate and  $0.01\text{ ppm}$  onto SERS substrate to calculate EF.

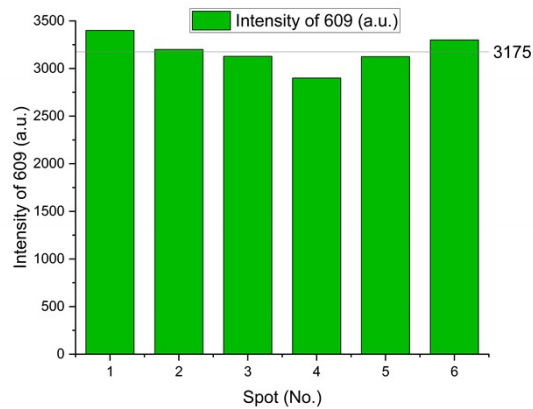

**Fig. S7.** The intensity at  $609\text{ cm}^{-1}$  peak of R6G on six SERS  $\text{MoO}_x$  substrates which fabricated under the same condition.

**Table S5:** SERS intensity of R6G at 609 cm<sup>-1</sup> peak absorbing on six MoO<sub>x</sub> SERS substrates which fabricated under the same condition

| No.              | 1     | 2       | 3         | 4       | 5    | 6    |
|------------------|-------|---------|-----------|---------|------|------|
| Intensity (a.u.) | 3400  | 3200    | 3128      | 2900    | 3125 | 3300 |
| <b>Summary</b>   |       |         |           |         |      |      |
| Count            | Sum   | Average | SD        | RSD (%) |      |      |
| 6                | 19053 | 3175.5  | 171.58526 | 5.38    |      |      |

**Table S6:** SERS intensity of R6G at 609 cm<sup>-1</sup> peak at five random positions with 1 ppm adsorbed on the surface of MoO<sub>x</sub> SERS substrate produced after 3 months, 6 months, and 9 months.

| No.            | 3 months | 6 months | 9 months |           |         |
|----------------|----------|----------|----------|-----------|---------|
| 1              | 3000     | 3200     | 3100     |           |         |
| 2              | 3100     | 2950     | 3200     |           |         |
| 3              | 2800     | 3257     | 2500     |           |         |
| 4              | 3500     | 2400     | 2800     |           |         |
| 5              | 3200     | 2784     | 2700     |           |         |
| <b>Summary</b> |          |          |          |           |         |
| Sample         | count    | sum      | average  | SD        | RSD (%) |
| 3 months       | 5        | 15600    | 3120     | 258.84358 | 8.23    |
| 6 months       | 5        | 14591    | 2918     | 347.04063 | 11.89   |
| 9 months       | 5        | 14300    | 2860     | 482.70074 | 13.32   |
